# Supplementary material for: Factors Associated with Exclusive Breastfeeding of Preterm Infants. Results from a Prospective National Cohort Study
Source: PubMed Central journal article supplement (PMC3929624; doi:10.1371/journal.pone.0089077), 2014-02-19
Supplement: pone.0089077.s001.pdf [file pone.0089077.s001.pdf]

Ward number \_\_\_\_\_ Code number \_\_\_\_\_

## Breastfeeding study of preterm infants in neonatal wards in Denmark 2009 – 2011

### Questionnaire 1 for the baby's mother

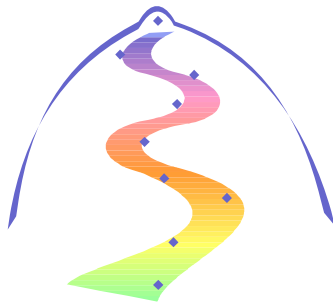

**Beginning of hospitalization**

Thank you for participating in the study.

We ask you to answer this questionnaire when your baby is about one week old. The questions are about you, the delivery, how your first week has passed and whether you have started breast milk pumping and/or are breastfeeding.

For each question, you are asked to either write your answer or tick a box. If you may tick more than one box, this will be stated in the question.

You can always ask the nursing staff for help in completing the questionnaire if you need to. Once you have completed the questionnaire, please return it to the nursing staff.

After you have returned this form, you will receive the next questionnaire, which you are requested to complete and return when your baby is discharged from the neonatal ward.

The questionnaire is filled in; date: \_\_\_\_\_

**The first questions are about your baby's birth (delivery) and how you and your baby are doing right now.**

1. Your baby was born: date: \_\_\_\_\_

2. The gestational age of your baby at birth: \_\_\_\_\_ weeks \_\_\_\_\_ days

3. Birth weight: \_\_\_\_\_ grams

4. Your baby is:

A girl <sub>1</sub>

A boy <sub>2</sub>

5. Your baby is born by Caesarean section

Yes <sub>1</sub>

No <sub>2</sub>

6. Did you have complications in connection to labour/delivery, which prevented you, for more than the first 24 hours, from being together with your baby?

Yes <sub>1</sub>

No <sub>2</sub>

7. Have you and your baby been admitted to different wards after the delivery?

Yes <sub>1</sub>

No <sub>2</sub>

8. Today your baby is \_\_\_\_\_ days old.

9. Yesterday your baby was placed in:

A closed incubator <sub>1</sub>

An open incubator <sub>2</sub>

A cot/bed <sub>3</sub>

### Questions about breastfeeding

The next questions are about your experiences and thoughts about breastfeeding.

10. Did you plan to breastfeed your baby?

Yes (Proceed to question 12) <sub>1</sub>

No <sub>2</sub>

11. What is your reason for not breastfeeding?

(Please answer this question and proceed to question 16)

I do not want to breastfeed <sub>1</sub>

I cannot breastfeed (e.g. because of breast surgery) <sub>2</sub>

I am not allowed to breastfeed (e.g. because of medication) <sub>3</sub>

Other reasons <sub>4</sub>

Please describe: \_\_\_\_\_

12. For how long have you planned to breastfeed your baby?

Until the baby is \_\_\_\_\_ month(s) old

13. For how long have you planned to breastfeed your baby if your baby was born at the estimated date of delivery?

Until the baby is \_\_\_\_\_ month(s) old

14. Of how great importance is it to you to breastfeed?

Very great importance <sub>1</sub>

Great importance <sub>2</sub>

Some importance <sub>3</sub>

Little importance <sub>4</sub>

No importance <sub>5</sub>

I don't know <sub>6</sub>

15. How confident are you that you can breastfeed your preterm baby for as long as you have planned?

- Very confident \_1
- Confident \_2
- Don't know \_3
- Uncertain \_4
- Very uncertain \_5

16. Does your partner support your choice of breastfeeding?

- Yes \_1
- No \_2
- I don't know \_3
- I'm alone with my baby \_4

17. Have you breastfed before?

- Yes \_1
- No, this is my first child \_2  
*(Proceed to question 19)*
- No, I haven't breastfed my other children \_3  
*(Proceed to question 19)*

18. For how long have you breastfed your children?

Child No. 1: Exclusive breastfeeding for \_\_\_\_\_ month(s)  
Breastfeeding for a total of \_\_\_\_\_ month(s)

Child No. 2: Exclusive breastfeeding for \_\_\_\_\_ month(s)  
Breastfeeding for a total of \_\_\_\_\_ month(s)

Child No. 3: Exclusive breastfeeding for \_\_\_\_\_ month(s)  
Breastfeeding for a total of \_\_\_\_\_ month(s)

Child No. 4: Exclusive breastfeeding for \_\_\_\_\_ month(s)  
Breastfeeding for a total of \_\_\_\_\_ month(s)  
*(if you have more children, continue here)*

19. What are your experiences with breastfeeding in your close family/network?

- Mostly positive experiences \_1
- Mostly negative experiences \_2
- No experiences \_3

20. What are your experiences with breastfeeding in your partner's close family/network?

- Mostly positive experiences \_1
- Mostly negative experiences \_2
- No experiences \_3

21. What are your experiences with breastfeeding preterm babies in your and your partner's close family/network

- Mostly positive experiences \_1
- Mostly negative experiences \_2
- No experiences \_3

**Questions about breast milk pumping**

22. Have you started breast milk pumping for your baby?

- Yes \_1
- No (Proceed to question 26) \_2

23. When did you pump for the first time?

- Before my baby was 6 hours old \_1
- When my baby was 6 – 12 hours old \_2
- When my baby was 12 – 24 hours old \_3
- When my baby was 24 – 48 hours old \_4
- When my baby was more than 48 hours old \_5

24. How many times have you pumped for the last 24 hours? \_\_\_\_\_ times

25. How much milk did you pump in total for the last 24 hours?

- Less than 50 ml \_1
- 50 – 200 ml \_2
- 200 – 400 ml \_3
- 400 – 750 ml \_4
- More than 750 ml \_5

26. How is your baby being fed right now? (You may tick more than one box)

- Breastfeeding \_1
- Feeding tube \_2
- Cup \_3
- Lact-aid \_4
- Finger-feeding \_5
- Bottle \_6
- Intravenous nutrition \_7

**Questions about skin-to-skin contact**

*(With skin-to-skin contact we mean that your baby is only dressed in a nappy, maybe a cap and socks, and maybe an open blouse, but in a way that your baby's stomach, chest and legs are in direct contact with your (or another adult's) bare chest.)*

27. When did you (the mother) at first have your baby skin-to-skin?

- Immediately after the baby was born \_1
- Short time after delivery = 0 – 6 hours \_2
- 6 – 24 hours after delivery \_3
- 1 – 2 days after delivery \_4
- More than two days after delivery \_5
- My baby has not been skin-to-skin with me \_6

28. When did your partner (or another adult) at first have your baby skin-to-skin?

- Immediately after the baby was born \_1
- Short time after delivery = 0 – 6 hours \_2
- 6 – 24 hours after delivery \_3
- 1 – 2 days after delivery \_4
- More than two days after delivery \_5
- My baby has not been skin-to-skin with my partner (or another adult) \_6

29. For how long did your baby have skin-to-skin contact yesterday?

*(You are supposed to add the hours, if your baby was skin-to-skin with persons other than yourself)*

- 0 – 1 hours \_1
- 1 – 2 hours \_2
- 2 – 4 hours \_3
- 4 – 6 hours \_4
- 6 – 8 hours \_5
- 8 – 12 hours \_6
- More than 12 hours \_7
- My baby did not have skin-to-skin contact yesterday \_8

**General questions about you and your schooling**

30. How old are you? \_\_\_\_\_ years

31. How do you live?

Together with my baby's father \_1

Together with an adult other than my baby's father \_2

Alone \_3

32. Do you have other children at home (apart from your new-born baby)?

Yes \_1

No \_2

If yes, please give the number \_\_\_\_\_ and ages of the children \_\_\_\_\_

33. In which country are you born? \_\_\_\_\_

34. Which language do you speak at home? \_\_\_\_\_

35. Which schooling have you completed?

9th grade (or lower) without examination \_1

9th grade with examination \_2

10th grade with examination \_3

Senior high (10th – 12th grade) \_4

Other \_5

Please describe: \_\_\_\_\_

36. Which educational courses/programmes have you completed or are you taking?

None \_1

Labour-market courses, special training programmes \_2

Occupational programmes (apprenticeship, traineeship e.g. carpentry, welding) \_3

Short secondary educational programmes (2-3 years) \_4

Medium-length secondary educational programmes (3-4 years) \_5

Long secondary educational programmes (4-6 years or longer) \_6

37. How was your employment situation before delivery?

Student \_1

Homemaker \_2

Unemployed \_3

Retired \_4

Working part time \_5

Working full time \_6

38. Do you smoke?

Yes \_1

No \_2

Thank you for completing the questionnaire.

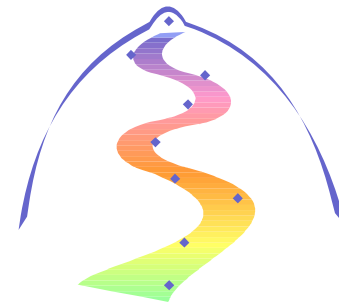

Please return the questionnaire to the staff.

*The survey is done in cooperation with*  
Knowledge Centre for Breastfeeding Infants with Special Needs  
Copenhagen University Hospital, Rigshospitalet  
Department of Neonatology  
Copenhagen  
Denmark
