# Supplementary material for: Factors Associated with Exclusive Breastfeeding of Preterm Infants. Results from a Prospective National Cohort Study
Source: PubMed Central journal article supplement (PMC3929624; doi:10.1371/journal.pone.0089077), 2014-02-19
Supplement: pone.0089077.s003.pdf [file pone.0089077.s003.pdf]

Ward number \_\_\_\_\_ Code number \_\_\_\_\_

Telephone interview by: \_\_\_\_\_

Date: \_\_\_\_\_

We are phoning you/writing to you because you are participating in "The breastfeeding survey of preterm infants", and we hope you have time to answer the following questions.

## Breastfeeding study of preterm infants in neonatal wards in Denmark 2009 – 2011

### Questionnaire 3

#### Telephone interview with the baby's mother

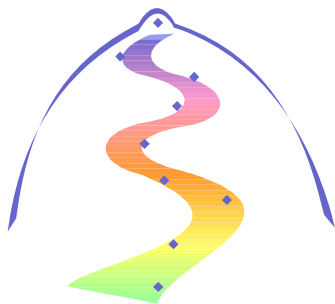

### Follow-up

1. Your baby's corrected age (age after term):

1 month  <sub>1</sub>

4 months  <sub>2</sub>

6 months  <sub>3</sub>

12 months  <sub>4</sub>

2. Are you still breastfeeding?

Yes, my baby is fully breastfed\* (Proceed to question 5)  <sub>1</sub>

Yes I am breastfeeding, but my baby is also getting

something else  <sub>2</sub>  
(Go to question 3)

No, I am not breastfeeding any longer  <sub>3</sub>  
(Proceed to question 4)

3. When did your baby start being fed in a way other than breastfeeding?

Approx. date \_\_\_\_\_

a. What is your baby getting besides breastfeeding?

(You may tick more than one box)

Pumped breast milk  <sub>1</sub>

Infant formula  <sub>2</sub>

Solid foods  <sub>3</sub>

Gruel  <sub>4</sub>

b. What was the reason(s) that you stopped full breastfeeding?

\_\_\_\_\_  
\_\_\_\_\_  
\_\_\_\_\_  
\_\_\_\_\_

\* With full breastfeeding we mean that the baby is only fed at and from the breast. In Denmark that means, that besides breastfeeding, the baby can be given water and/or a maximum of one formula feed a week.

4. When did you completely stop breastfeeding? Date \_\_\_\_\_ (approx.)

a. What is your baby getting instead of breastfeeding?  
(You may tick more than one box)

- Pumped breast milk \_1
- Infant formula \_2
- Solid foods \_3
- Gruel \_4

b. What was the reason(s) that you completely stopped breastfeeding?

---



---



---



---

**The following questions are about the use of a nipple shield.**

5. Did you use a nipple shield for breastfeeding your preterm infant?

Yes \_1

No (Proceed to question 9) \_2

6. When did you begin using the nipple shield?

In hospital \_1

After discharge \_2

7. Are you still using the nipple shield?

Yes (Proceed to question 9) \_1

No \_2

8. If no, when did you stop using the nipple shield? Date: \_\_\_\_\_ (approx.)

**Some questions about breast milk pumping.**

9. Did you continue to pump breast milk after discharge?

Yes \_1

No (Proceed to question 12) \_2

10. Are you still pumping?

Yes (Proceed to question 12) \_1

No \_2

11. If no, when did you stop breast milk pumping? Approx. date: \_\_\_\_\_

**The last questions are about breastfeeding problems**

12. Have you experienced breastfeeding problems (since last questionnaire/contact)?

Yes \_1

No \_2

Which problems: \_\_\_\_\_

---



---



---



---

13. How would you describe your breastfeeding after discharge?

Mainly functioning \_1

Mainly problematic \_2

Thank you for taking your time to answer the questionnaire.  
If you are not breastfeeding or pumping any more, we will not contact you again.
